# Supplementary material for: Chchd10 is dispensable for myogenesis but critical for adipose browning
Source: PubMed Central journal article supplement (PMC8975916; doi:10.1186/s13619-022-00111-0), 2022-04-01
Supplement: 13619_2022_111_MOESM1_ESM.pdf [file 13619_2022_111_MOESM1_ESM.pdf]

**Supplemental Table 1. List of primers for qPCR analysis.**

| Gene           | Primer sequence                                     |
|----------------|-----------------------------------------------------|
| 18S            | F: AGTCCCTGCCCTTTGTACACA R: CGATCCGAGGGCCTCACTA     |
| <i>Chchd10</i> | F: CAGCCGGGTCTTATGGCTC R: CAGGCTCTGAATTTCCCCAC      |
| <i>Ucp1</i>    | F: AGGCTTCCAGTACCATTAGGT R: CTGAGTGAGGCAAAGCTGATTT  |
| <i>Pgc1α</i>   | F:TATGGAGTGACATAGAGTGTGCT R: CCACTTCAATCCACCCAGAAAG |
| <i>Pparγ</i>   | F:TCGCTGATGCACTGCCTATG R: GAGAGGTCCACAGAGCTGATT     |
| <i>Pparγ2</i>  | F: GGAAGACCACTCGCATTCTT R: GTAATCAGCAACCATTGGGTCA   |
| <i>MyoD</i>    | F: GGCTACGACACCGCCTACTA R: CGACTCTGGTGGTGCATCTG     |
| <i>MyoG</i>    | F: TGCCCAGTGAATGCAACTCC R: TTGGGCATGGTTTTCGTCTGG    |
| <i>Myh4</i>    | F: AGGACCAACTGAGTGAAGTGA R: GGGAAAACCTCGCCTGACTCTG  |
| <i>Myh8</i>    | F: GGAGAGGATTGAGGCCCAAAA R: CACGGTCACTTTCCCTCCATC   |
| <i>Cox7a1</i>  | F: GCTCTGGTCCGGTCTTTTAGC R: GTACTGGGAGGTCATTGTCCG   |
| <i>Cox8b</i>   | F: GCGAAGTTCACAGTGGTTCC R: GGAACCATGAAGCCAACGAC     |

**Supplemental Table 2. List of antibodies used in this study**

| Antibody                                  | Dilution (WB) | Dilution (IF,IHC) | Manufacture                          |
|-------------------------------------------|---------------|-------------------|--------------------------------------|
| UCP1                                      | 1:2000        | 1:200             | Abcam                                |
| AP2                                       | 1:1000        |                   | Santa Cruz                           |
| PPAR $\gamma$                             | 1:1000        |                   | Santa Cruz                           |
| PGC1 $\alpha$                             | 1:1000        |                   | Santa Cruz                           |
| FABP4                                     | 1:1000        |                   | Abcam                                |
| OXPHOS                                    | 1:2000        |                   | Abcam                                |
| CHCHD10                                   | 1:500         | 1:200             | Proteintech (CAT#25671-1-AP)         |
| $\beta$ -tublin                           | 1:1000        |                   | Abcam                                |
| $\beta$ -actin                            | 1:1000        |                   | Santa Cruz                           |
| GAPDH                                     | 1:1000        |                   | Santa Cruz                           |
| Goat Anti-Mouse IgG(H + L)-HRP Conjugate  | 1:10000       |                   | Jackson Immuno Research Labs         |
| Goat Anti-Rabbit IgG(H + L)-HRP Conjugate | 1:10000       |                   | Jackson Immuno Research Labs         |
| PAX7                                      |               | 1:10              | Developmental Studies Hybridoma Bank |
| MF20                                      | 1:200         | 1:100             | Developmental Studies Hybridoma Bank |
| MYOG                                      | 1:500         | 1:500             | Developmental Studies Hybridoma Bank |
| TDP43                                     | 1:500         | 1:200             | Abcam                                |
| 568 goat polyclonal anti-mouse IgG1       |               | 1:1000            | Thermo Fisher                        |
| 488 goat polyclonal anti-rabbit IgG       |               | 1:1000            | Thermo Fisher                        |
| 488 goat polyclonal anti-mouse IgG2b      |               | 1:1000            | Thermo Fisher                        |
